# Supplementary material for: Decorated single-enantiomer phosphoramide-based silica/magnetic nanocomposites for direct enantioseparation
Source: Royal Society of Chemistry journal article supplement (doi:10.1039/c9ra03260f), 2019-01-01
Supplement: c9ra03260f1.pdf [file c9ra03260f1.pdf]

**Supplementary Information**

for

**Decorated Single-Enantiomer Phosphoramidate-Based Silica/Magnetic  
Nanocomposites for Direct Enantioseparation**

Fatemeh Karimi Ahmadabad,<sup>a</sup> Mehrdad Pourayoubi<sup>\*a</sup> and Hadi Bakhshi<sup>b</sup>

<sup>a</sup>Department of Chemistry, Faculty of Science, Ferdowsi University of Mashhad, Mashhad, Iran

<sup>b</sup>Macromolecular Chemistry II, University of Bayreuth, Universitätsstraße 30, 95440 Bayreuth, Germany

\*For correspondence: [pourayoubi@um.ac.ir](mailto:pourayoubi@um.ac.ir) (M. Pourayoubi)

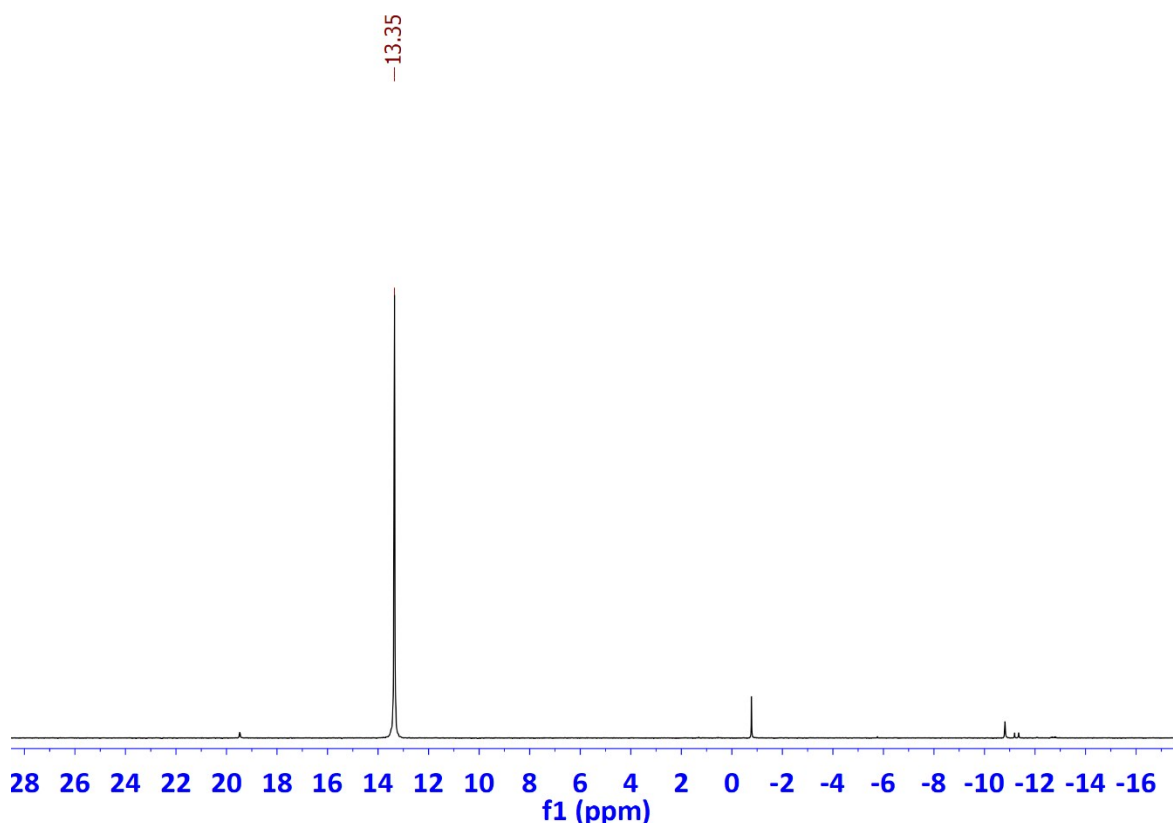

**Figure S1.** The  $^{31}\text{P}\{^1\text{H}\}$  NMR spectrum of  $\text{P}(=\text{O})(\text{NH}-R-(+)\text{CH}(\text{CH}_3)\text{C}_6\text{H}_5)_2(\text{NH}(\text{CH}_2)_3\text{Si}(\text{OCH}_3)_3)$ .

#### Assignments of NMR signals for $\text{P}(=\text{O})(\text{NH}-R-(+)\text{CH}(\text{CH}_3)\text{C}_6\text{H}_5)_2(\text{NH}(\text{CH}_2)_3\text{Si}(\text{OCH}_3)_3)$ (PTA(+))

The assignments of NMR signals of  $\text{NH}(\text{CH}_2)_3\text{Si}(\text{OCH}_3)_3$  and two  $\text{NH}-R-(+)\text{CH}(\text{CH}_3)\text{C}_6\text{H}_5$  fragments in the title compound were carried out by the comparative study of NMR spectra with those in closely related compounds.

The suitable compound for study of  $\text{NH}(\text{CH}_2)_3\text{Si}(\text{OCH}_3)_3$  segment was not found in the literature; thus, we decided to synthesize a new phosphoramidate compound including this fragment, *i.e.*  $\text{P}(\text{O})(\text{OC}_6\text{H}_5)_2(\text{NH}(\text{CH}_2)_3\text{Si}(\text{OCH}_3)_3)$  (PA). In this compound (figure. S2), the aliphatic groups are merely related to the  $\text{NH}(\text{CH}_2)_3\text{Si}(\text{OCH}_3)_3$  fragment, which allow to easy assignments of signals related to this silicon-based amine fragment.

The phosphoric triamide  $[2,6\text{-F}_2\text{-C}_6\text{H}_3\text{C}(\text{O})\text{NH}][R-(+)\text{C}_6\text{H}_5\text{CH}(\text{CH}_3)\text{NH}]_2\text{P}(\text{O})^{\text{S1}}$  (FPTA(+)) was chosen for the assignments of signals related to the chiral amine. In this compound, two sets of signals appear for two chiral amines (for both in  $^1\text{H}$  NMR and  $^{13}\text{C}$ -NMR spectra), typically two triplets for two NH units, similar to what was observed in the title compound.

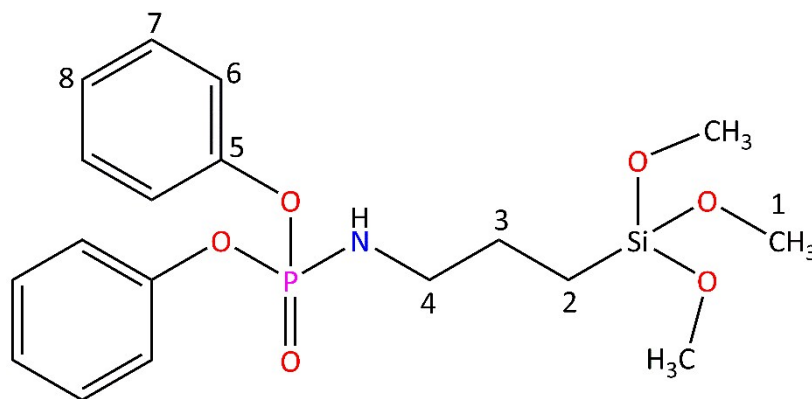

**Figure S2.** The chemical structure of  $P(O)(OC_6H_5)_2(NH(CH_2)_3Si(OCH_3)_3)$ .

According to the aliphatic region of the  $^1H$ -NMR spectrum of PA, the signals at 0.45, 1.45 and 2.90 ppm correspond to the three  $CH_2$  groups and the signals at 3.31 and 4.16 ppm are related to  $CH_3$  and  $NH$  groups, respectively. Therefore, the signals at 0.56, 1.57, 2.02, 3.48 and 4.28 ppm in the  $^1HNMR$  spectrum of PTA(+) are respectively assigned to three methylene of  $CH_2CH_2CH_2$  segment, methyl and  $NH$ . The appearance of  $NH$  peaks in both PA and PTA(+) is the same and both of them are broad.

In the  $^{13}C$ -NMR spectrum of PA, the signals in the aliphatic region are three singlets at 5.93, 44.01 and 50.18 ppm and a doublet at 24.50 ppm ( $^3J_{P-C} = 6.0$  Hz). Comparatively, the two singlets at 6.42 and 46.22 ppm and the doublet at 25.09 ppm ( $^3J_{P-C} = 6.5$  Hz) for PTA(+) correspond to the  $CH_2$  carbon atoms of  $CH_2CH_2CH_2$  fragment. The other signal is in the region that the signals of two  $CH$  units of two chiral segments also appear (50.10-50.90 ppm).

In the  $^1H$ -NMR spectrum of PTA(+), the remaining signals in the aliphatic region are related to two  $CH$  and two  $CH_3$  groups. Therefore, the overlapped signals at 1.38 ppm and within 3.98-4.22 ppm correspond to two  $CH$  and two  $CH_3$  groups, respectively. Similar signals in the  $^1H$ -NMR spectrum of FPTA(+) appear at 1.38-1.40 and 4.29-4.45 ppm, respectively. The triplets at 3.40 and 3.88 ppm for PTA(+) assign to two  $NH$  protons, in comparison with the triplets at 4.88 and 4.97 ppm in FPTA(+).

In the  $^{13}C$ -NMR spectrum of PTA(+), the signals at 21.63 and 23.76 ppm are related to the carbon atoms of two  $CH_3$  groups. Similar signals for FPTA(+) appear as doublets at 24.92 and 25.48 ppm, however in PTA(+) the intensity of signals are low and decision about the fine structure is impossible. The two signals related to two  $CH$  units appear in the range of 50.10-50.90 ppm, where the signal of  $OCH_3$  of silicon-based amine fragment also appears. The two  $CH$  units in the literature compound appear as singlets at 49.68 and 50.03 ppm. Also, the  $^{13}C$ -

NMR of  $\text{Fe}_3\text{O}_4@\text{SiO}_2@(-\text{O}_2(\text{OCH}_3)\text{Si}[(\text{CH}_2)_3\text{NH}_2]$  in solid state has been confirm the assignment of  $^{13}\text{C}$ -NMR of PA and PTA.<sup>52</sup>

The assignment of  $^1\text{H}$  and  $^{13}\text{C}$  signals of aromatic segments in the title compound are not difficult, as there is no crowding in this region.

The phosphoramidate  $\text{P}(\text{O})(\text{OC}_6\text{H}_5)_2(\text{NH}(\text{CH}_2)_3\text{Si}(\text{OCH}_3)_3)$  does not show the triethylamine-hydrochloride salt in the THF solution, in opposite with this impurity in the solution of  $\text{P}(\text{=O})(\text{NH}-R-(+)\text{CH}(\text{CH}_3)\text{C}_6\text{H}_5)_2(\text{NH}(\text{CH}_2)_3\text{Si}(\text{OCH}_3)_3)$  phosphoric triamide. The amount of impurity was estimated according to the integration in the  $^1\text{H}$ -NMR spectrum. For this aim, the overlapped signals related to two methyl groups of two chiral amines were adjusted for 6H and in this case, the signal of 9 methyl protons of triethylamine shows an integration about 2.30, showing about 13% impurity of triethylamine hydrochloride. The position of one H atom attached to N in  $\text{Et}_3\text{NHCl}$  was not identified, as the integration of about 0.26 probably was overlapped in the aromatic region or exchange with some exchangeable mobile protons.

#### **Synthesis of $\text{P}(\text{O})(\text{OC}_6\text{H}_5)_2(\text{NH}(\text{CH}_2)_3\text{Si}(\text{OCH}_3)_3)$**

A solution of RMBA (2.5 mmol) and TEA (2.5 mmol) in dry THF (5 ml) was added dropwise to a stirring solution of  $\text{PO}(\text{OC}_6\text{H}_5)_2\text{Cl}$  (2.5 mmol) in the same solvent (10 ml) at  $0^\circ\text{C}$ . After stirring for 4 h, the obtained white solid (triethylamine-hydrochloride salt) was filtered off and the filtrate was concentrated in vacuum, and a few amounts of this solution was directly used for the NMR experiments, after adding two droplets of  $\text{CDCl}_3$  to the NMR tube for adjustment requirement.  $^{31}\text{P}\{^1\text{H}\}$ -NMR (THF/ $\text{CDCl}_3$ , ppm):  $-0.23$ .  $^{13}\text{C}\{^1\text{H}\}$ -NMR (THF/ $\text{CDCl}_3$ , ppm): 5.93 (*s*,  $\text{C}_2$ ), 24.50 (*d*,  $\text{C}_3$ ,  $^3J_{\text{P-C}} = 6.0$  Hz), 44.01 (*s*,  $\text{C}_4$ ), 50.18 (*s*,  $\text{C}_1$ ), 120.07 (*d*,  $\text{C}_6$ ,  $^3J_{\text{P-C}} = 4.9$  Hz), 124.48 (*s*,  $\text{C}_8$ ), 129.36 (*s*,  $\text{C}_7$ ), 150.91 (*d*,  $\text{C}_5$ ,  $^2J_{\text{P-C}} = 6.7$  Hz).  $^1\text{H}$ -NMR (THF/ $\text{CDCl}_3$ , ppm): 0.45 (*m*, 2H,  $\text{CH}_2$ ), 1.45 (*m*, 2H,  $\text{CH}_2$ ), 2.90 (*m*, 2H,  $\text{CH}_2$ ), 3.31 (*m*, 9H,  $\text{CH}_3$ ), 4.16 (*b*, 1H, NH), 6.99-7.19 (*m*, 10H,  $\text{CH}_{\text{aromatic}}$ ).

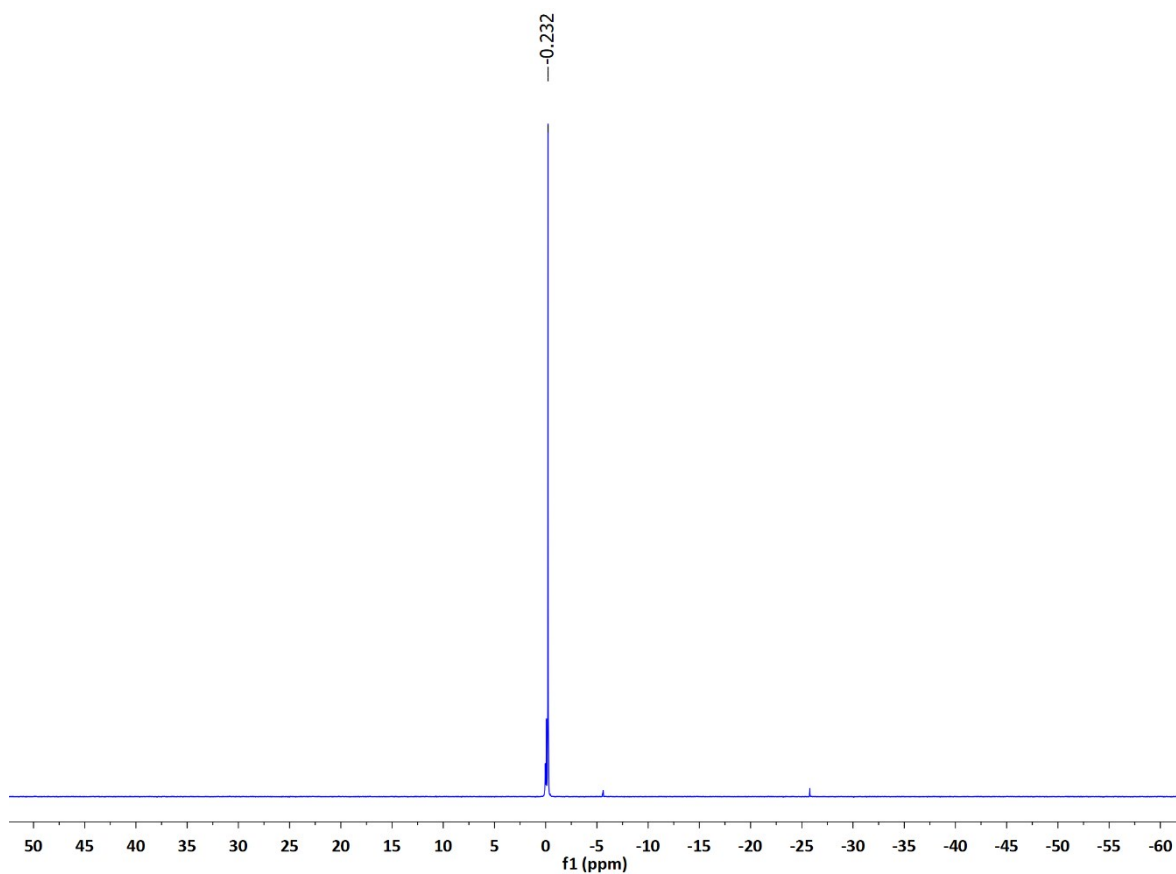

**Figure S3.** The  $^{31}\text{P}\{^1\text{H}\}$  NMR spectrum of  $\text{P}(\text{O})(\text{OC}_6\text{H}_5)_2(\text{NH}(\text{CH}_2)_3\text{Si}(\text{OCH}_3)_3)$

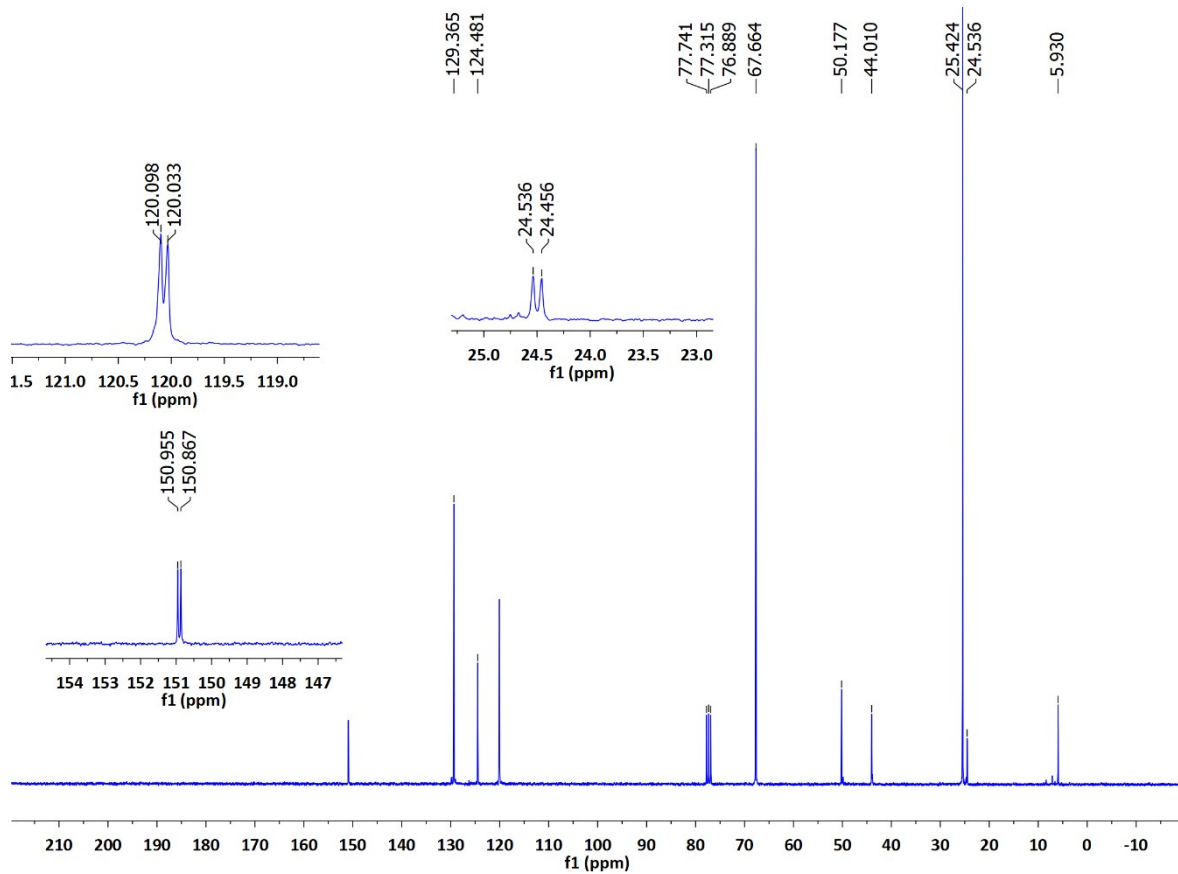

**Figure S4.** The  $^{13}\text{C}\{^1\text{H}\}$  NMR spectrum of  $\text{P}(\text{O})(\text{OC}_6\text{H}_5)_2(\text{NH}(\text{CH}_2)_3\text{Si}(\text{OCH}_3)_3)$ .

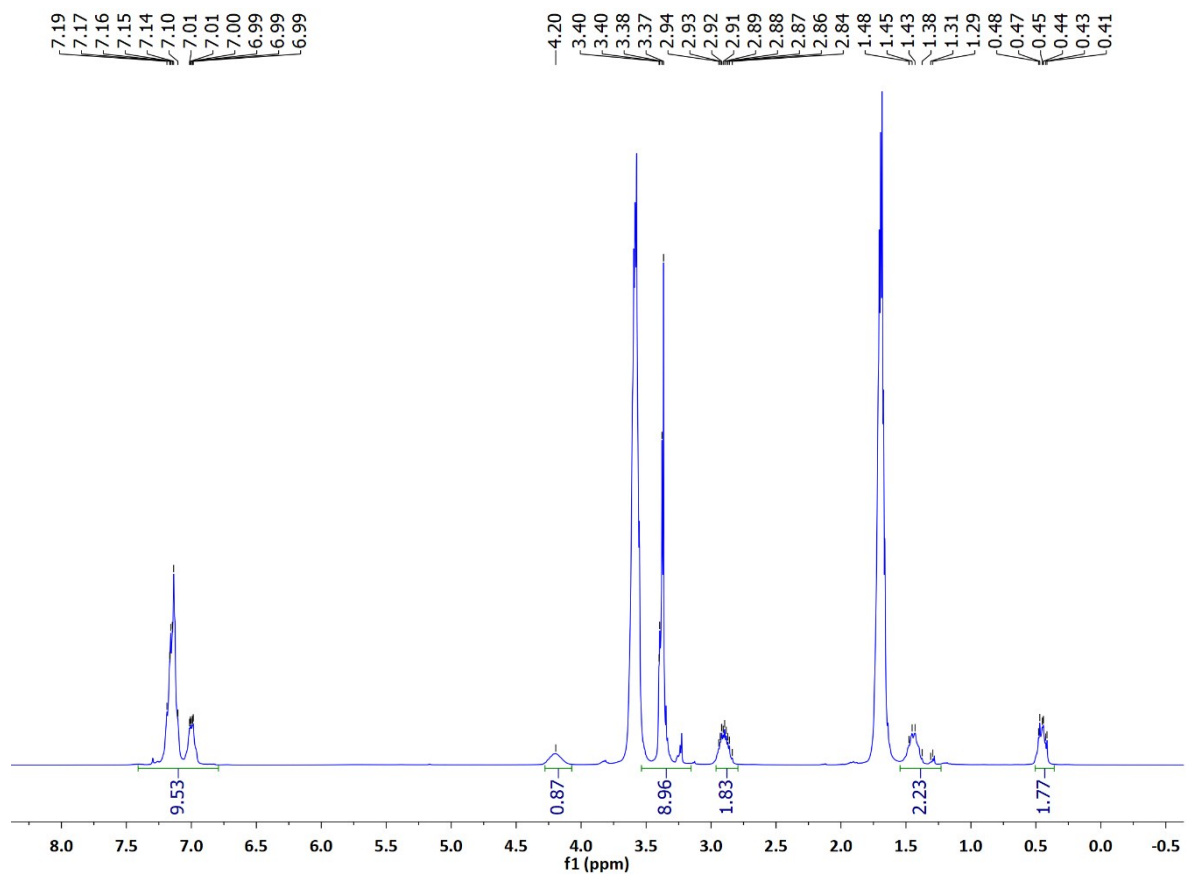

**Figure S5.** The  $^1\text{H-NMR}$  spectrum of  $\text{P(O)(OC}_6\text{H}_5)_2(\text{NH(CH}_2)_3\text{Si(OCH}_3)_3)$ .

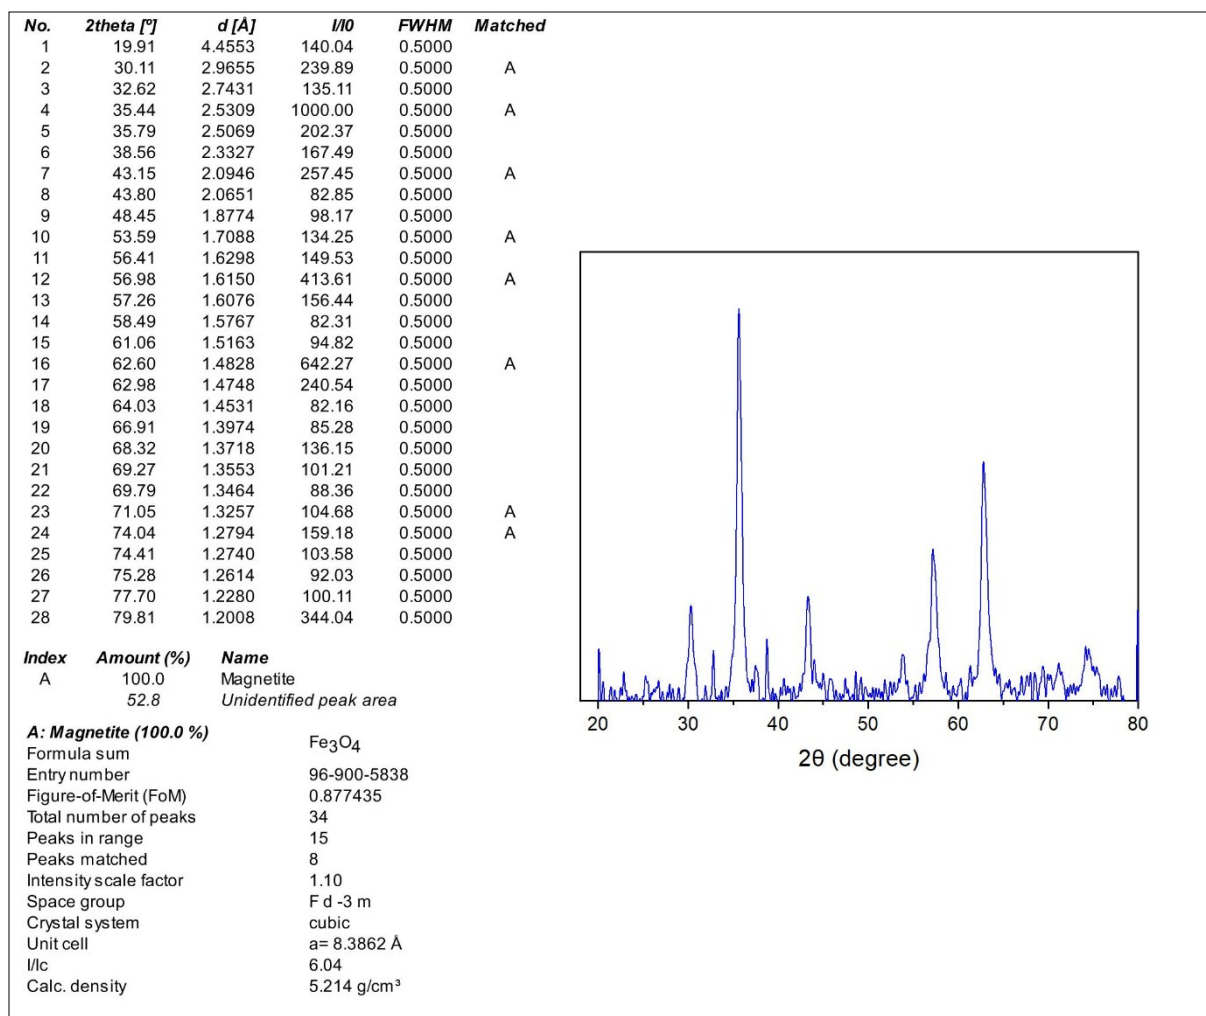

**Figure S6.** The XRD spectrum and related details of Fe<sub>3</sub>O<sub>4</sub>.

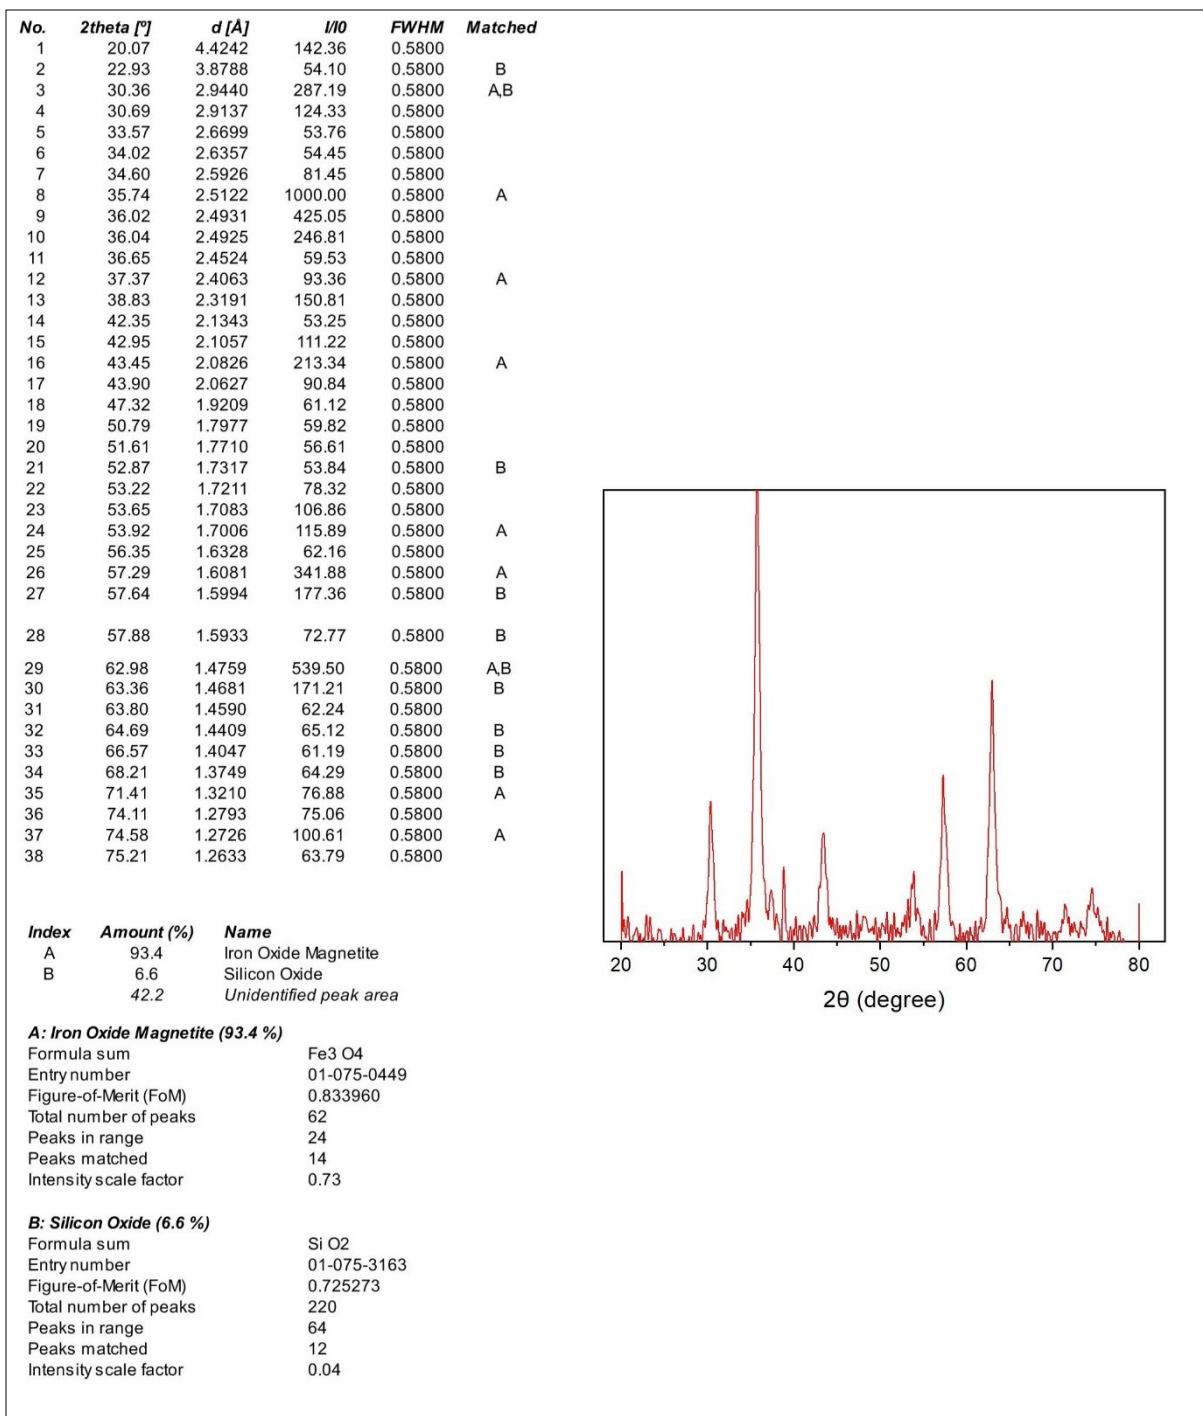

**Figure S7.** The XRD spectrum and related details of Fe<sub>3</sub>O<sub>4</sub>@SiO<sub>2</sub>.



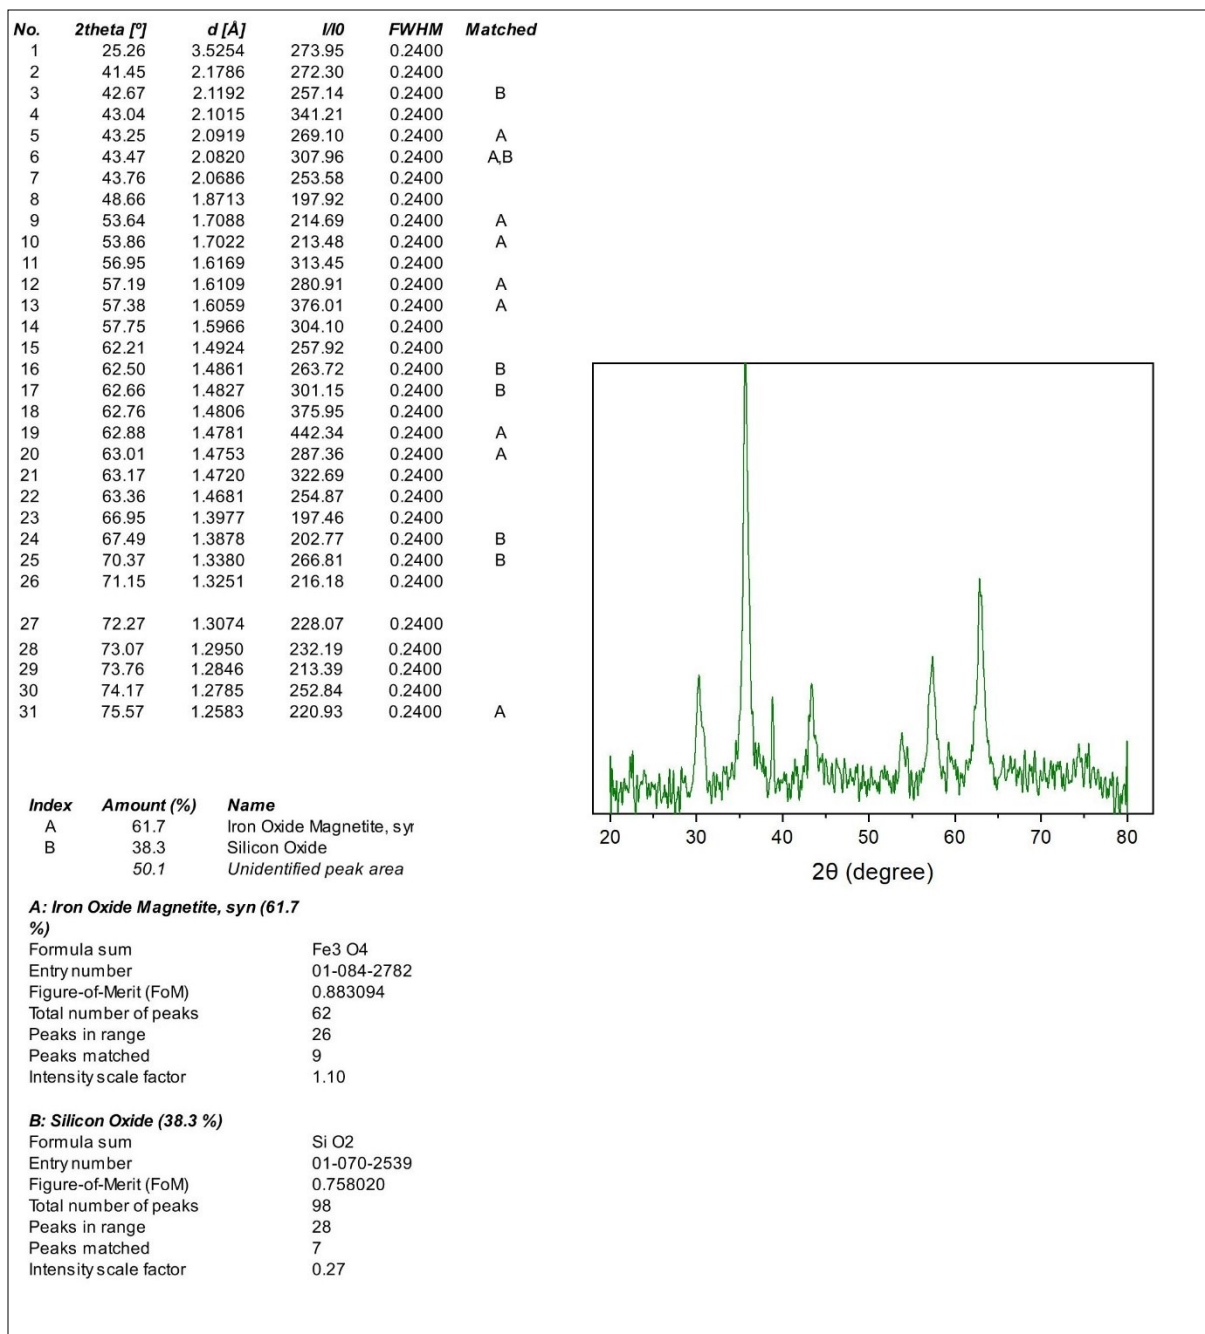

**Figure S8.** The XRD spectrum and related details of Fe<sub>3</sub>O<sub>4</sub>@SiO<sub>2</sub>@PTA(+).

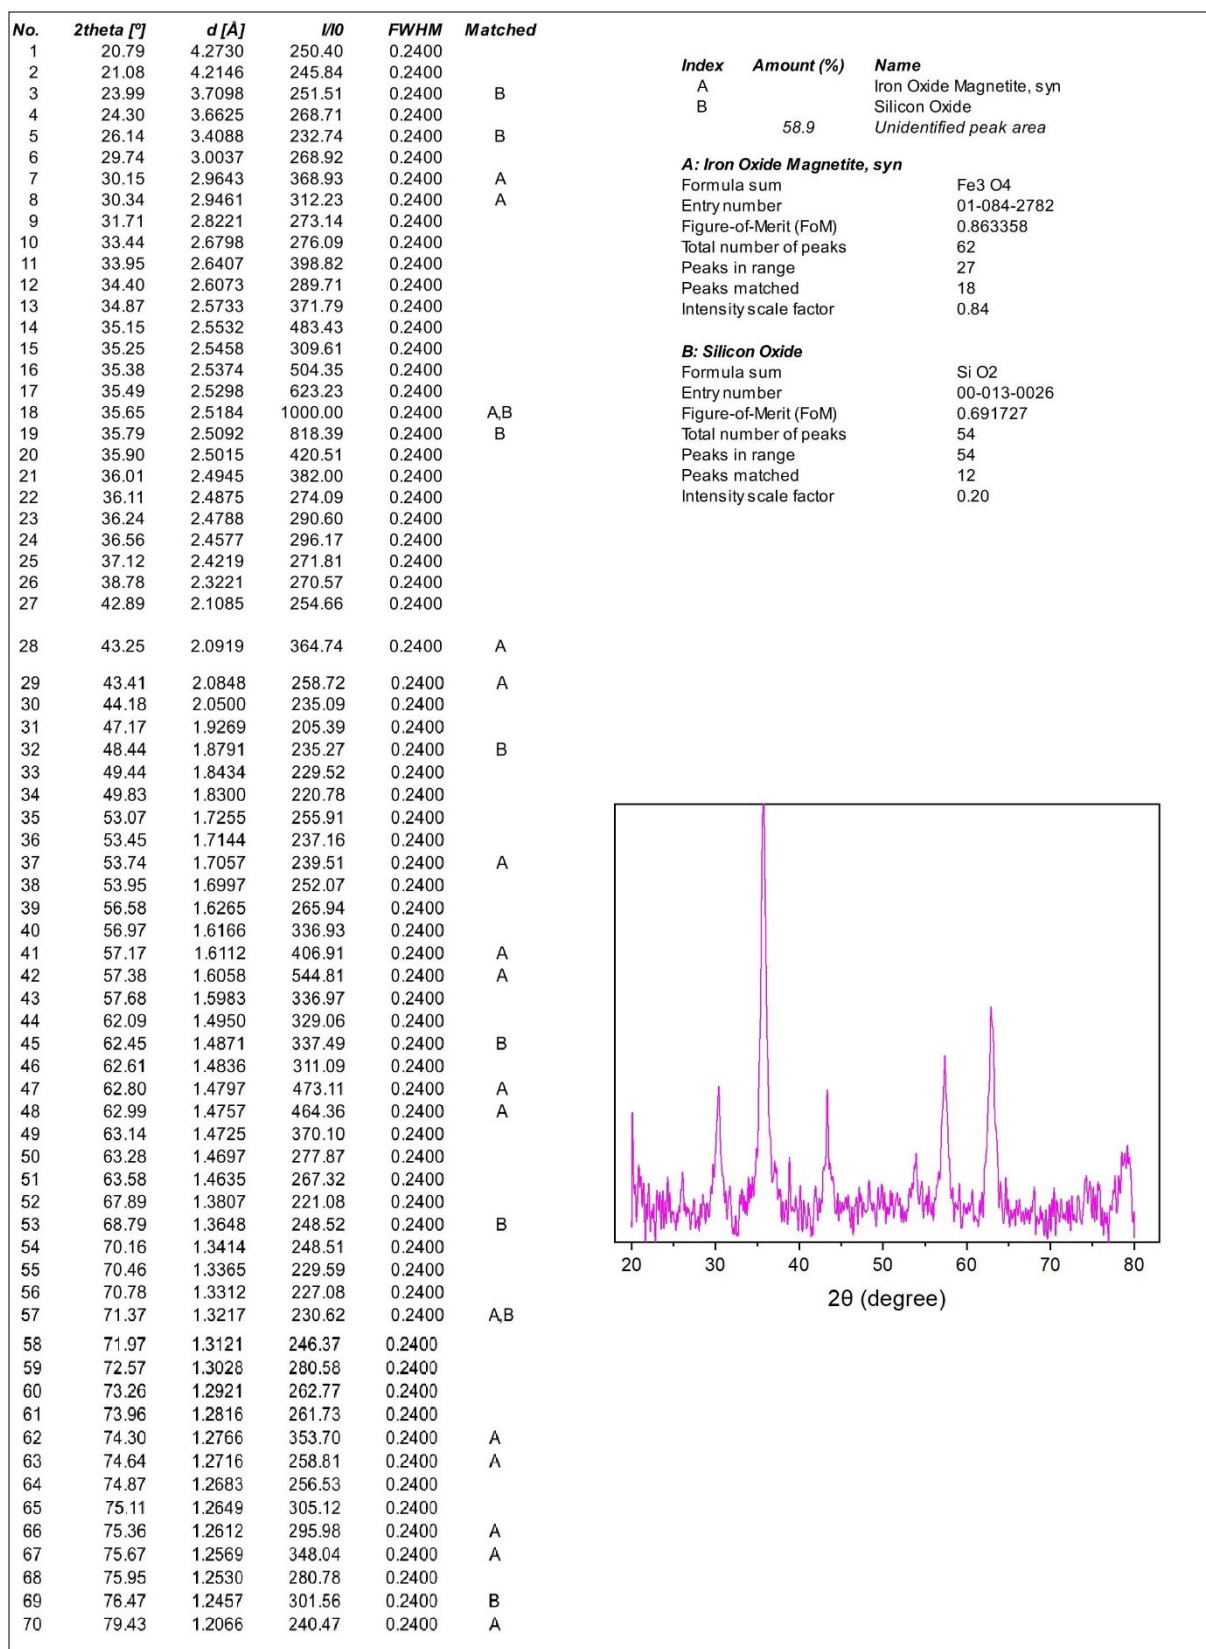

**Figure S9.** The XRD spectrum and related details of Fe<sub>3</sub>O<sub>4</sub>@SiO<sub>2</sub>@PTA(-).

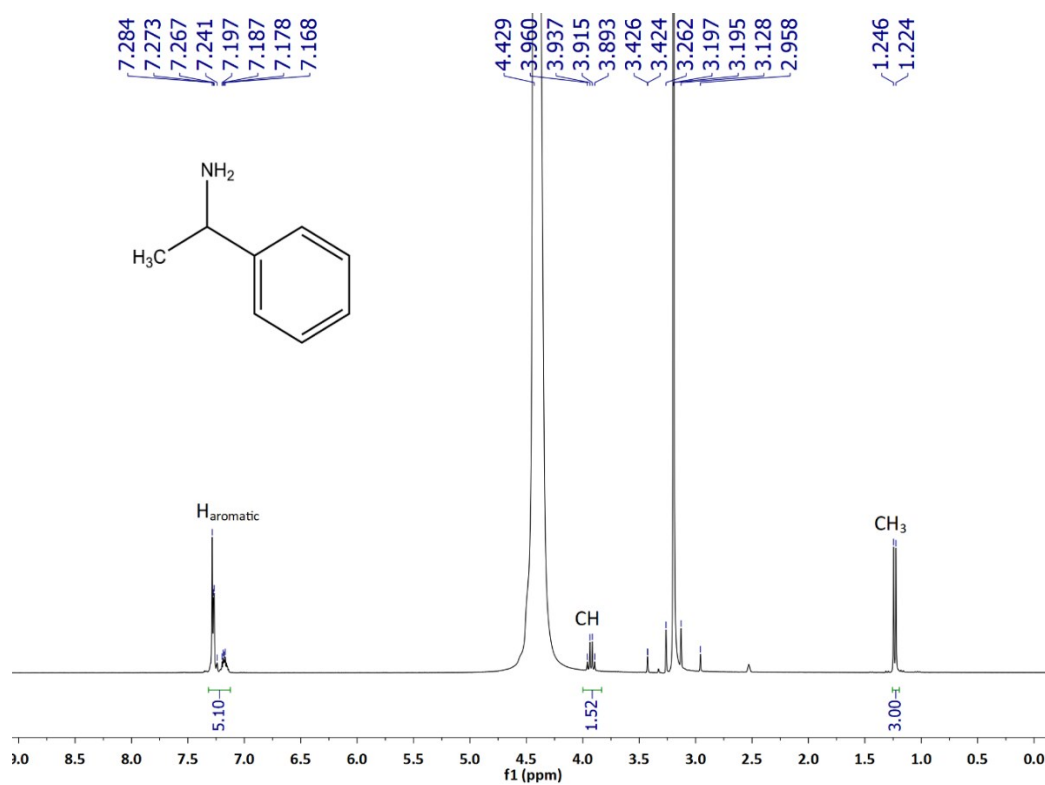

**Figure S10.** The <sup>1</sup>H-NMR spectrum of (±)-MBA solution(H<sub>2</sub>O/CH<sub>3</sub>OH) after enantioseparation.

## References

- S1 M. E. Toularoud, M. Pourayoubi, M. Dušek, V. Eigner and K. Damodaran, *Acta Crystallogr. Sect. C Struct. Chem.*, 2018, **74**, 608–617.
- S2 S. Radi, S. Tighadouini, M. Bacquet, S. Degoutin, F. Cazier, M. Zaghrioui and Y. N. Mabkhot, *Molecules*, 2013, **19**, 247–262.
